# Supplementary material for: Supermarket Circulars Promoting the Sales of ‘Healthy’ Foods: Analysis Based on Degree of Processing
Source: MDPI journal article supplement (doi:10.3390/nu12092877), 2020-09-21
Supplement: s1 [file s1]

**Table S1. NOVA food groups: definition according to the extent and purpose of food processing, with examples**

| NOVA GROUP                                                | DEFINITION                                                                                                                                                                                                                                                                                                                                                                                                                                                                                                                                                                                                                                                                                                                                                                                                                                                                                                                                                                                   | EXAMPLES                                                                                                                                                                                                                                                                                                                                                                                                                                                                                                                                                                                                                                                                                                                                                                                                                                                                                                                                                                                                                                                                                                                                                                                                                                                                                                                                                                                    |
|-----------------------------------------------------------|----------------------------------------------------------------------------------------------------------------------------------------------------------------------------------------------------------------------------------------------------------------------------------------------------------------------------------------------------------------------------------------------------------------------------------------------------------------------------------------------------------------------------------------------------------------------------------------------------------------------------------------------------------------------------------------------------------------------------------------------------------------------------------------------------------------------------------------------------------------------------------------------------------------------------------------------------------------------------------------------|---------------------------------------------------------------------------------------------------------------------------------------------------------------------------------------------------------------------------------------------------------------------------------------------------------------------------------------------------------------------------------------------------------------------------------------------------------------------------------------------------------------------------------------------------------------------------------------------------------------------------------------------------------------------------------------------------------------------------------------------------------------------------------------------------------------------------------------------------------------------------------------------------------------------------------------------------------------------------------------------------------------------------------------------------------------------------------------------------------------------------------------------------------------------------------------------------------------------------------------------------------------------------------------------------------------------------------------------------------------------------------------------|
| <p><b>1) Unprocessed or minimally processed foods</b></p> | <p><b>Unprocessed:</b> edible parts of plants (fruits, seeds, leaves, stems, roots, tubers) or of animals (muscle, offals, eggs, milk), and also fungi, algae and water, after separation from nature.</p> <p><b>Minimally processed:</b> unprocessed foods altered by industrial processes such as removal of inedible or unwanted parts, drying, crushing, grinding, fractioning, roasting, boiling, pasteurisation, refrigeration, freezing, placing in containers, vacuum packaging, non-alcoholic fermentation, and other methods that do not add salt, sugar, oils or fats or other food substances to the original food. The main aim of these processes is to extend the life of unprocessed foods, enabling their storage for longer use, and, often, to make their preparation easier or more diverse.</p> <p>Infrequently, minimally processed foods contain additives that prolong product duration, protect original properties or prevent proliferation of microorganisms.</p> | <p>Fresh, squeezed, chilled, frozen, or dried fruits and leafy and root vegetables; grains such as brown, parboiled or white rice, corn cob or kernel, wheat berry or grain; legumes such as beans, lentils, and chickpeas; starchy roots and tubers such as potatoes, sweet potatoes and cassava; fungi such as fresh or dried mushrooms; meat, poultry, fish and seafood, whole or in the form of steaks, fillets and other cuts, fresh or chilled or frozen; eggs; fresh or pasteurized milk; fresh or pasteurised fruit or vegetable juices (with no added sugar, sweeteners or flavours); grits, flakes or flour made from corn, wheat, oats, or cassava; tree and ground nuts and other oily seeds (with no added salt or sugar); herbs and spices used in culinary preparations, such as thyme, oregano, mint, pepper, cloves and cinnamon, whole or powdered, fresh or dried; fresh or pasteurized plain yoghurt; tea, coffee, and drinking water. Also includes foods made up from two or more items in this group, such as dried mixed fruits, granola made from cereals, nuts and dried fruits with no added sugar, honey or oil; pasta, couscous and polenta made with flours, flakes or grits and water; and foods with vitamins and minerals added generally to replace nutrients lost during processing, such as wheat or corn flour fortified with iron and folic acid.</p> |

|                                                 |                                                                                                                                                                                                                                                                                                                                                                                                                                                                                                                                              |                                                                                                                                                                                                                                                                                                                                                                                                                                                                                                                                                    |
|-------------------------------------------------|----------------------------------------------------------------------------------------------------------------------------------------------------------------------------------------------------------------------------------------------------------------------------------------------------------------------------------------------------------------------------------------------------------------------------------------------------------------------------------------------------------------------------------------------|----------------------------------------------------------------------------------------------------------------------------------------------------------------------------------------------------------------------------------------------------------------------------------------------------------------------------------------------------------------------------------------------------------------------------------------------------------------------------------------------------------------------------------------------------|
| <p><b>2) Processed culinary ingredients</b></p> | <p>Substances obtained directly from group 1 foods or from nature by industrial processes such as pressing, centrifuging, refining, extracting or mining. Their use is in the preparation, seasoning and cooking of group 1 foods. These products may contain additives that prolong product duration, protect original properties or prevent proliferation of microorganisms.</p>                                                                                                                                                           | <p>Vegetable oils crushed from seeds, nuts or fruits (notably olives); butter and lard obtained from milk and pork; sugar and molasses obtained from cane or beet; honey extracted from combs and syrup from maple trees; starches extracted from corn and other plants, and salt mined or from seawater, vegetable oils with added anti-oxidants, and table salt with added drying agents. Includes products consisting of two group 2 items, such as salted butter, and group 2 items with added vitamins or minerals, such as iodised salt.</p> |
| <p><b>3) Processed foods</b></p>                | <p>Products made by adding salt, oil, sugar or other group 2 ingredients to group 1 foods, using preservation methods such as canning and bottling, and, in the case of breads and cheeses, using non-alcoholic fermentation. Processes and ingredients here aim to increase the durability of group 1 foods and make them more enjoyable by modifying or enhancing their sensory qualities. These products may contain additives that prolong product duration, protect original properties or prevent proliferation of microorganisms.</p> | <p>Canned or bottled vegetables and legumes in brine; salted or sugared nuts and seeds; salted, dried, cured, or smoked meats and fish; canned fish (with or without added preservatives); fruits in syrup (with or without added anti-oxidants); freshly made unpackaged breads and cheeses.</p>                                                                                                                                                                                                                                                  |
| <p><b>4) Ultra-processed foods</b></p>          | <p>Formulations of ingredients, mostly of exclusive industrial use, that result from a series of industrial processes (hence 'ultra-processed'), many requiring sophisticated equipment and technology. Processes enabling the</p>                                                                                                                                                                                                                                                                                                           | <p>Carbonated soft drinks; sweet or savoury packaged snacks; chocolate, candies (confectionery); ice-cream; mass-produced packaged breads and buns; margarines and other spreads; cookies (biscuits), pastries, cakes, and cake mixes; breakfast 'cereals', 'cereal' and 'energy' bars; 'energy' drinks; milk</p>                                                                                                                                                                                                                                  |

---

|                                                                                                                                                                                                                                                                                                                                                                                                                                                                                                                                                                                                                                                                                                                                                                                                                                                                                                                                                                                                                                                                                                                                                                                                               |                                                                                                                                                                                                                                                                                                                                                                                                                                                                                              |
|---------------------------------------------------------------------------------------------------------------------------------------------------------------------------------------------------------------------------------------------------------------------------------------------------------------------------------------------------------------------------------------------------------------------------------------------------------------------------------------------------------------------------------------------------------------------------------------------------------------------------------------------------------------------------------------------------------------------------------------------------------------------------------------------------------------------------------------------------------------------------------------------------------------------------------------------------------------------------------------------------------------------------------------------------------------------------------------------------------------------------------------------------------------------------------------------------------------|----------------------------------------------------------------------------------------------------------------------------------------------------------------------------------------------------------------------------------------------------------------------------------------------------------------------------------------------------------------------------------------------------------------------------------------------------------------------------------------------|
| <p>manufacture of ultra-processed foods include the fractioning of whole foods into substances, chemical modifications of these substances, assembly of unmodified and modified food substances using industrial techniques such as extrusion, moulding and pre-frying, frequent application of additives whose function is to make the final product palatable or hyper-palatable ('cosmetic additives'), and sophisticated packaging, usually with synthetic materials. Ingredients often include sugar, oils and fats, and salt, generally in combination; substances that are sources of energy and nutrients but of no or rare culinary use such as high fructose corn syrup, hydrogenated or interesterified oils, and protein isolates; cosmetic additives such as flavours, flavour enhancers, colours, emulsifiers, sweeteners, thickeners, and anti-foaming, bulking, carbonating, foaming, gelling, and glazing agents; and additives that prolong product duration, protect original properties or prevent proliferation of microorganisms. Processes and ingredients used to manufacture ultra-processed foods are designed to create highly profitable products (low cost ingredients, long</p> | <p>drinks, 'fruit' yoghurts and 'fruit' drinks; 'cocoa' drinks; 'instant' sauces; infant formulas, follow-on milks, other baby products; 'health' and 'slimming' products such as meal replacement shakes and powders. Many ready to heat products including pre-prepared pies and pasta and pizza dishes; poultry and fish 'nuggets' and 'sticks', sausages, burgers, hot dogs, and other reconstituted meat products, and powdered and packaged 'instant' soups, noodles and desserts.</p> |
|---------------------------------------------------------------------------------------------------------------------------------------------------------------------------------------------------------------------------------------------------------------------------------------------------------------------------------------------------------------------------------------------------------------------------------------------------------------------------------------------------------------------------------------------------------------------------------------------------------------------------------------------------------------------------------------------------------------------------------------------------------------------------------------------------------------------------------------------------------------------------------------------------------------------------------------------------------------------------------------------------------------------------------------------------------------------------------------------------------------------------------------------------------------------------------------------------------------|----------------------------------------------------------------------------------------------------------------------------------------------------------------------------------------------------------------------------------------------------------------------------------------------------------------------------------------------------------------------------------------------------------------------------------------------------------------------------------------------|

---

---

|                                                                                                                                                                      |  |
|----------------------------------------------------------------------------------------------------------------------------------------------------------------------|--|
| shelf-life, emphatic branding), convenient (ready-to-consume) hyper-palatable snacked products liable to displace all other NOVA food groups, notably group 1 foods. |  |
|----------------------------------------------------------------------------------------------------------------------------------------------------------------------|--|

---

Reference: Monteiro, C.A.; Cannon, G.; Levy, R.B.; Moubarac, J.-C.; Louzada, M.L.; Rauber, F.; Khandpur, N.; Cediel, G.; Neri, D.; Martinez-Steele, E.; et al. Ultra-processed foods: what they are and how to identify them. *Public Health Nutr.* 2019, 22, 936–941, doi:10.1017/S1368980018003762.

Table S2. Additional Claims (AC) in FoP labels of foods advertised in ‘health and wellness’ sections of supermarket circulars, classified by themes.

| THEME                              | ADDITIONAL CLAIMS                                                 |
|------------------------------------|-------------------------------------------------------------------|
| FREE-FROM OR LOW IN LACTOSE        | Free-from lactose                                                 |
|                                    | Low in lactose                                                    |
| FREE-FROM GLUTEN OR WHEAT-FREE     | Free-from gluten                                                  |
|                                    | Wheat free                                                        |
| VITAMINS, MINERALS AND FATTY ACIDS | Vitamins                                                          |
|                                    | Vitamin E                                                         |
|                                    | Vitamin D                                                         |
|                                    | Vitamin B2 + vitamin B12                                          |
|                                    | With vitamin C                                                    |
|                                    | 10 vitamins and minerals                                          |
|                                    | 26 vitamins and minerals for everyday                             |
|                                    | Calcium                                                           |
|                                    | Calcium + magnesium + vitamin B complex, and vitamins A, C, and D |
|                                    | Essential fatty acids                                             |
| PLANT-BASED                        | Vegan                                                             |
|                                    | 100% veggie                                                       |
|                                    | No animal ingredients                                             |
|                                    | Vegetable-based ingredients                                       |
| PROTEIN                            | 3.7g protein                                                      |
|                                    | 9g protein                                                        |
|                                    | 13g protein                                                       |
|                                    | 14g protein                                                       |
|                                    | 21g protein                                                       |
|                                    | 23g protein                                                       |
|                                    | 15g whey protein                                                  |
|                                    | Whey isolate                                                      |
|                                    | 5g BCAAs                                                          |
| PROBIOTICS                         | Milk and probiotics                                               |
|                                    | Daily probiotic shot                                              |
|                                    | With active <i>Lactobacillus</i>                                  |
| PRESENCE OF SWEETENERS             | 100% Stevia                                                       |
|                                    | With natural Stevia                                               |
|                                    | Sweetened with Stevia                                             |
|                                    | Sweetened with sucralose                                          |
| ORGANIC                            | Organic                                                           |
| NON-TRANSGENIC                     | Non-transgenic                                                    |
|                                    | Soy-free                                                          |
| NATURAL                            | 100% natural                                                      |
|                                    | Natural salts                                                     |
|                                    | Natural as it should be                                           |
|                                    | With natural ingredients                                          |
|                                    | Contains natural fibres and vitamins A and C                      |

|                                                 |                                                                               |
|-------------------------------------------------|-------------------------------------------------------------------------------|
| <b>LOW FAT CONTENT</b>                          | 17% fat                                                                       |
|                                                 | 10% fat                                                                       |
|                                                 | Only 1% fat                                                                   |
| <b>WHOLE GRAIN AND FIBRE</b>                    | Whole grain                                                                   |
|                                                 | Whole grain first ingredient                                                  |
|                                                 | With 14 grains                                                                |
|                                                 | Made with Granfibra®                                                          |
|                                                 | With cereals, oat, rice, wheat and corn                                       |
|                                                 | With fibre                                                                    |
| <b>HIGHLIGHT ON THE PRESENCE OF INGREDIENTS</b> | Soluble fibre                                                                 |
|                                                 | With fruit flakes                                                             |
|                                                 | Pure fruit                                                                    |
|                                                 | With fruit bits / pieces                                                      |
|                                                 | Sweetened only with sugar contained in fruits                                 |
|                                                 | Only fruit, ready for the lunchbox                                            |
|                                                 | 100% grape juice                                                              |
|                                                 | Whole fruit juice / 100% fruit juice                                          |
|                                                 | With brown sugar                                                              |
|                                                 | Oats and brown sugar                                                          |
|                                                 | 24% oat                                                                       |
|                                                 | With oats and chocolate chips                                                 |
|                                                 | With cocoa nibs                                                               |
|                                                 | With Saracen grains                                                           |
|                                                 | With rice, oats and flaxseed                                                  |
|                                                 | 20% rice                                                                      |
|                                                 | 100% buffalo                                                                  |
|                                                 | Coconut water with 100% Brazilian green coconut                               |
|                                                 | 100% color and flavour from the tomatoes                                      |
|                                                 | Made with almonds                                                             |
| With nutrients from cane sugar plant            |                                                                               |
| <b>HIGHLIGHT ON THE ABSENCE OF INGREDIENTS</b>  | With Himalayan pink salt                                                      |
|                                                 | Contains honey                                                                |
|                                                 | With cotton oil                                                               |
|                                                 | No added preservatives                                                        |
| <b>HEALTH AND NUTRITION</b>                     | No added water                                                                |
|                                                 | Zero / no sweeteners                                                          |
|                                                 | 0% corn starch                                                                |
|                                                 | 0% <i>blah blah blah (referred not to have ingredients other than fruits)</i> |
|                                                 | Energy booster                                                                |
|                                                 | Pure energy                                                                   |
|                                                 | Healthier                                                                     |
|                                                 | Live healthier                                                                |
|                                                 | Have a healthier life                                                         |
|                                                 | Your healthier choice                                                         |
|                                                 | Nutrient rich                                                                 |
|                                                 | More nutritious and tasty                                                     |
| More full nutrition                             |                                                                               |
| With nutritious grains                          |                                                                               |
| Grains of goodness                              |                                                                               |
| Balance and digestion                           |                                                                               |

|                                                                      |                                              |
|----------------------------------------------------------------------|----------------------------------------------|
|                                                                      | Low fat absorption                           |
|                                                                      | Contains beta-glucan                         |
|                                                                      | Fruit with high antioxidant power            |
|                                                                      | Less processed                               |
| <b>CULTIVATION,<br/>PRODUCTION AND<br/>COOKING PRACTICES</b>         | Baked                                        |
|                                                                      | Steamed                                      |
|                                                                      | Here we have family farming                  |
|                                                                      | From the farm to your table                  |
|                                                                      | Free range                                   |
|                                                                      | No added hormones or therapeutic antibiotics |
|                                                                      | Fed with 100% vegetables                     |
|                                                                      | Biological fermentation                      |
|                                                                      | Made with ingredients you know               |
|                                                                      | Handmade                                     |
| <b>BETTER QUALITY</b>                                                | Gourmet                                      |
|                                                                      | Premium                                      |
|                                                                      | Superior quality                             |
|                                                                      | Selected fruits                              |
|                                                                      | With selected grains                         |
| <b>APPEAL TO SENSORY<br/>CHARACTERISTICS</b>                         | Experience the amazing flavor                |
|                                                                      | Crispier texture                             |
|                                                                      | Great taste after every bite                 |
|                                                                      | Aromatic and refined                         |
|                                                                      | Refined and outstanding                      |
|                                                                      | Dense and balanced                           |
| Cereal letters ( <i>cereals with letter format - visual appeal</i> ) |                                              |

Reference: Created by the authors (2020).

## Saudáveis

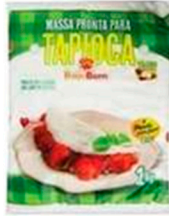

Tapioca BejuBom 1 kg (unidade)

**R\$ 6,99**

Limite máximo, de compras deste produto, por cliente: 10 unidades

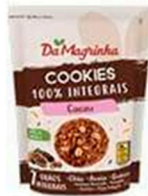

Cookies Integral Da Magrinha 150 g (unidade)

**R\$ 3,79**

Limite máximo, de compras deste produto, por cliente: 10 unidades

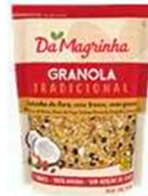

Granola Da Magrinha 850 g (unidade)

**R\$ 16,99**

Limite máximo, de compras deste produto, por cliente: 10 unidades

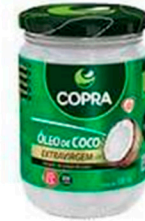

Oleo de Coco Copra 500 g (unidade)

**R\$ 32,99**

Limite máximo, de compras deste produto, por cliente: 10 unidades

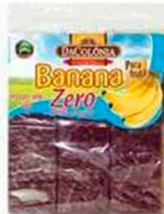

Bananinha Zero Da Colonia 180 g (unidade)

**R\$ 5,99**

Limite máximo, de compras deste produto, por cliente: 10 unidades

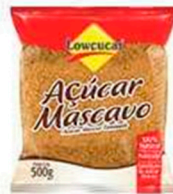

Açúcar Mascavo Lowçúcar 500 g (unidade)

**R\$ 5,89**

Limite máximo, de compras deste produto, por cliente: 10 unidades

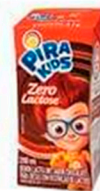

Bebida Láctea Piracanjuba Zero Lactose 200 ml (unidade)

**R\$ 1,49**

Limite máximo, de compras deste produto, por cliente: 10 unidades

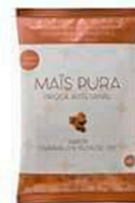

Pipoca Mais Pura 150 g (unidade)

**R\$ 8,99**

Limite máximo, de compras deste produto, por cliente: 10 unidades

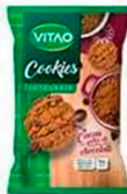

Cookies Integral Vitao 80 g (unidade)

**R\$ 2,49**

Limite máximo, de compras deste produto, por cliente: 10 unidades

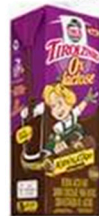

Bebida Láctea Tírol Chocolate 1 litro (Zero Lactose) (unidade)

**R\$ 4,99**

Limite máximo, de compras deste produto, por cliente: 10 unidades

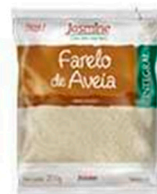

Farelo de Aveia Jasmine 200 g (unidade)

**R\$ 5,99**

Limite máximo, de compras deste produto, por cliente: 10 unidades

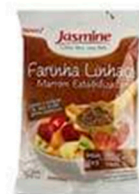

Linhaça Marrom Jasmine 200 g (unidade)

**R\$ 4,99**

Limite máximo, de compras deste produto, por cliente: 10 unidades

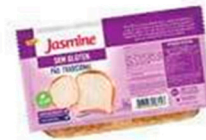

Pão Jasmine sem Glúten Fatiado 350 g (unidade)

**R\$ 12,99**

Limite máximo, de compras deste produto, por cliente: 10 unidades

Figure S1. Examples of circulars' health and wellness sections (page 1)



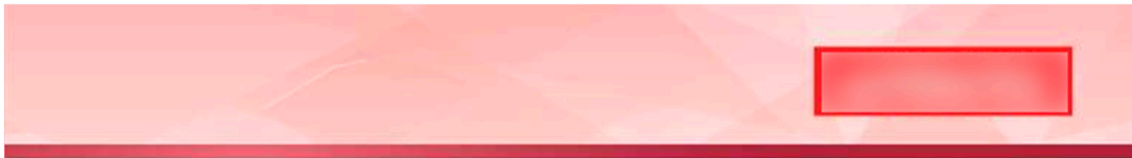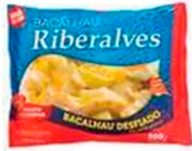

Bacalhau Riberalves  
Desfiado 500 g (unidade)

**R\$ 28,90**

Limite máximo, de compras deste produto, por cliente: 10 unidades

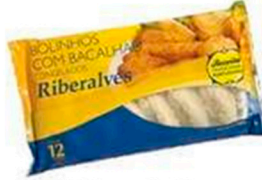

Bolinhos com Bacalhau  
Riberalves 360 g (unidade)

**R\$ 14,90**

Limite máximo, de compras deste produto, por cliente: 10 unidades

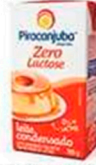

Leite Condensado  
Piracanjuba 395 g (zero lactose) (unidade)

**R\$ 4,99**

Limite máximo, de compras deste produto, por cliente: 10 unidades

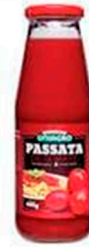

Passata de Tomate  
Unilagro 680 g (unidade)

**R\$ 5,99**

Limite máximo, de compras deste produto, por cliente: 20 unidades

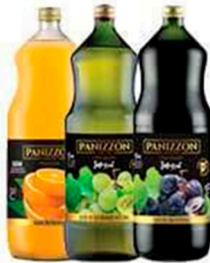

Suco Panizzon 1,5 litro  
(unidade)

**R\$ 9,90**

Limite máximo, de compras deste produto, por cliente: 10 unidades

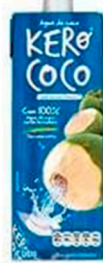

Água de Coco Kero Coco  
1 litro (unidade)

**R\$ 6,99**

Limite máximo, de compras deste produto, por cliente: 10 unidades

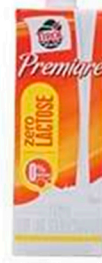

Leite Tirol Zero Lactose  
1 litro (unidade)

**R\$ 3,29**

Limite máximo, de compras deste produto, por cliente: 10 unidades

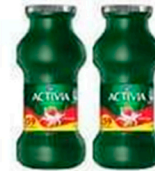

Leite Fermentado Danone  
Activa 150 g (unidade)

**R\$ 1,69**

Limite máximo, de compras deste produto, por cliente: 10 unidades

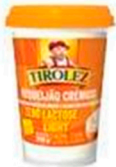

Queijão Tirolez Light  
Zero Lactose 200 g  
(unidade)

**R\$ 4,98**

Limite máximo, de compras deste produto, por cliente: 10 unidades

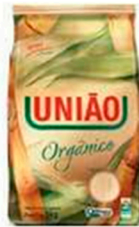

Açúcar União Cristal  
Organico 1 kg (unidade)

**R\$ 5,99**

Limite máximo, de compras deste produto, por cliente: 10 unidades

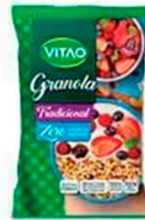

Granola Vitao 250 g  
(unidade)

**R\$ 5,99**

Limite máximo, de compras deste produto, por cliente: 10 unidades

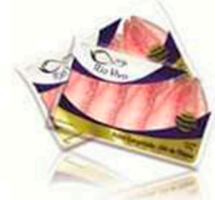

Filé de Tilápia Rio Vivo  
400 g (unidade)

**R\$ 12,99**

Limite máximo, de compras deste produto, por cliente: 10 unidades

o limite de 10 unidades é o máximo permitido em termos de quantidade e é recomendado para os clientes mais ativos

Figure S2. Examples of circulars' health and wellness sections (page 2)
